# Supplementary material for: Evidence for early life in Earth’s oldest hydrothermal vent precipitates
Source: Springer Nature journal article supplement (doi:10.1038/nature21377), 2017-02-28
Supplement: 41586_2017_BFnature21377_MOESM72_ESM.pdf [file 41586_2017_BFnature21377_MOESM72_ESM.pdf]

## Jaspers of the Løkken ophiolite

Jaspers are typically bedded cherts (silica-rich, microcrystalline rocks) rich in haematite  $\pm$  magnetite  $\pm$  Fe-silicate minerals. Stratiform occurrences of jasper with pillow basalts and volcanogenic massive sulphide deposits imply an origin from lithified hydrothermal precipitates<sup>21,27,29</sup>, formed in submarine settings analogous to those of modern mid-ocean ridges or back-arc sea-floor spreading centres, intra-plate seamounts, or flanks and calderas of arc volcanoes<sup>22,23,26</sup>. Si-Fe colloidal-gel protoliths of jaspers can be attributed to several processes, including *in situ* precipitation from low-temperature (20–100°C<sup>60</sup>) fluid flow through oceanic crust<sup>61</sup>, material derived from low-temperature (2–50°C) vent chimneys<sup>61</sup>, and proximal or distal sedimentation from hydrothermal plumes<sup>62</sup>.

The Early Ordovician (Tremadoc) Løkken ophiolite was deformed and emplaced during the Caledonian orogeny, reaching metamorphic grades of lower greenschist facies; the original setting was dominated by back-arc rifting in a marginal basin<sup>63</sup>. The ophiolite contains laterally extensive jaspilitic beds that cluster at stratigraphic levels equivalent to those of the Løkken and Høydal volcanogenic massive sulphide (VMS) deposits and are in places intimately associated with the Fe-Cu-Zn sulphide ore. The jasper, which formed originally as sea-floor gels, displays myriad exceptionally well-preserved primary textures, including haematitized bacteria remains, haematitic tubes, and a variety of textures attributed to gel maturation and more advanced diagenetic changes<sup>63</sup>. The gel was deposited by particle fallout from hydrothermal plumes, in which silica flocculation and rapid settling of colloidal particles was promoted by the bridging effect of Fe oxyhydroxide<sup>27</sup>. Fe was sourced from white smoker-type vents with high Fe/S ratios<sup>64</sup>, whereas silica is thought to be primarily of ambient seawater origin based on the interpretation of silica saturation or supersaturation in pre-Late Cretaceous oceans<sup>27</sup>. Trace element variations in the gel precursor were controlled by coprecipitation and/or adsorption by Fe oxyhydroxide particles within the plume(s), REE patterns (positive Eu and negative Ce anomalies) reflect mixing of hydrothermal solutions with seawater at dilution ratios of  $\sim 10^2$  to  $10^4$ .

## The Nuvvuagittuq Supracrustal belt (NSB)

The NSB is located in the Northeastern Superior Province, in northern Québec, Canada. It is surrounded and intruded by multiple generations of Eoarchaeon to Palaeoarchaeon tonalite-trondhjemitic-granodiorite (TTG) gneisses dated at 3760 Myr, 3660 Myr, 3500 Myr, and 3350 Myr<sup>65,66</sup>, and forms a core enclave within the Neoproterozoic TTG gneisses of the Inukjuak domain. The NSB is dominated by mafic amphibolites composed of cummingtonite-plagioclase-biotite $\pm$ garnet<sup>17</sup>.

The amphibolite unit has been interpreted to represent mafic volcanic deposits, with compositions ranging from basaltic to basaltic andesite<sup>11</sup>. In some locations, pillow lava structures are preserved within the amphibolite<sup>11</sup>. These amphibolites are divided into three geochemical groups displaying distinct Al/Ti ratios and following a chemostratigraphy within the NSB<sup>11</sup>. The base of the sequence is characterised by low Al/Ti

metabasaltic rocks with tholeiitic affinities. They exhibit relatively flat trace element profiles and their chemistry is consistent with derivation from an undepleted mantle source and fractionation under relatively dry conditions<sup>11</sup>. The top of the stratigraphy comprises amphibolites having geochemical compositions consistent with derivation from a re-enriched depleted mantle and fractionation under elevated water pressure<sup>11</sup>. They comprise high Al/Ti basaltic amphibolite relatively depleted in incompatible trace elements and displaying characteristic concave-up REE profiles typical of modern boninites. They are overlaid by intermediate Al/Ti amphibolite of basaltic to andesitic compositions with calc-alkaline affinities displaying LREE-enrichments and flat HREE profiles. Chemical sedimentary rocks (BIF and chert-like silica rocks) mark the transition in the stratigraphy between the low Al/Ti tholeiitic amphibolite and the higher Al/Ti boninitic and calc-alkaline amphibolite. This transition and chemo-stratigraphy led some to suggest that the NSB metavolcanic rocks were formed in subduction initiation settings similar to those of modern convergent tectonic settings<sup>67</sup>. Locally, the NSB amphibolite is composed of a cordierite-orthoamphibole mineral assemblage and is characterised by high Mg and K concentrations with depleted Ca, Na, and Si. This mineralogical assemblage and geochemical signature are consistent with seawater hydrothermal alteration of the oceanic crust<sup>68</sup>. Together with the presence of pillow lavas and BIF, this pattern suggests that the NSB formed through submarine volcanism with important hydrothermal activity.

On the basis of mineralogy, two broad types of BIF lithologies are recognized from the NSB including quartz + ferrous silicates (banded silicate formation (BSF) and quartz + magnetite + ferrous silicates (BIF)<sup>16</sup>. Other minor lithologies that have been identified in the belt are jasper-quartz-carbonate, quartz-biotite schists (with possible meta-conglomerates), and chromite-bearing silica rock<sup>69, 12, 18, 19</sup>.

Outcrops of BIF vary from 5 to 30m in thickness, with the jasper forming thinner beds of 1 m thickness and less, commonly interbedded with layers of amphibolite. In places, small veins, typically a few cm wide of jasper infiltrate and cut the amphibolite<sup>19</sup>, suggesting Fe-Si gels infilled networks within the (interpreted) pyroclastics during deposition. The depositional depth of the NSB jaspers is uncertain from the associated lithologies or textures in rocks of the belt; however, the occurrence of fine-scale, iron-oxide lamination (Fig. E3A) is similar to that in other younger jaspers and IFs suggestive of a calm depositional environment below wave base.

The NSB was mostly metamorphosed to upper amphibolite facies with temperatures reaching 650°C and 4–5 Kbar<sup>17,20</sup>. Sm–Nd isotopic compositions of garnets in the NSB amphibolites suggest that the peak metamorphic event occurred in the Neoarchaean<sup>14</sup> contemporaneous with intrusion of pegmatites dated at 2688 ± 2 Myr<sup>66</sup>. This is also consistent with the regional metamorphism occurring at 2705–2680 Myr<sup>70</sup>. The amphibolites in the southwest and southeast corners of the NSB are characterised by lower metamorphic grade assemblages of chlorite+epidote+actinolite. To the southeast, chlorite preserves the shape of what appears to have been garnet crystals, suggesting that the lower greenschist assemblage is retrograde<sup>17</sup>. No evidence of retrogressed garnet is observed in the lower grade facies to the southwest, which may never have reached upper amphibolite facies. Very local layers in Fe-cherts preserve primary chert, calcite rhombohedra, and well-formed minnesotaite needles in jasper, suggesting some rare layers escaped severe recrystallisation during peak metamorphism. Furthermore, the crystallisation temperatures estimated for graphitic carbon in rocks from the southwest corner of the NSB do not exceed 550°C (Table S9–10), suggesting that the metamorphic facies did not exceed much past greenschist facies.

The geochronology of the NSB is highly debated and two ages have been proposed for the contained metavolcanic rocks: an Eoarchaean age of ~3750 Myr<sup>69</sup> and a Hadaean age of ~4280 Myr<sup>15</sup>. Here we present an overview of this geochronological debate.

One of the challenges in precisely dating the formation of the NSB is the quasi-absence of zircon-bearing felsic rocks and their equivocal relationship to the mafic metavolcanic rocks. Rare bands of felsic rocks with trondhjemitic composition have yielded zircons dated by U–Pb between 3750 and 3774 Myr<sup>69,66,65,13,71</sup>. These trondhjemitic rocks consist of thin discontinuous bands 25–40 cm in width found only at the southern edge of the NSB<sup>17</sup>. Other interpretations placed these rocks as felsic intrusions due to cross-cutting relationships observed in the field<sup>69</sup>, thus giving a minimum age for the NSB. Other field evidence such as the presence of felsic intrusions within gabbro sills were used to reach to the same conclusion about their intrusive nature<sup>14,65</sup>. Other works, however, interpreted these rocks as felsic volcanites<sup>71</sup>, hence providing the actual age for the NSB. Significantly, this is inconsistent with the cross-cutting relationships observed by<sup>69</sup>. Fuchsitic quartz-rich rocks in the NSB have been interpreted as detrital quartzites by some works<sup>12</sup> which yielded 13 zircons with <sup>207</sup>Pb/<sup>206</sup>Pb ages ranging from 3718 Myr to 3780 Myr. These therefore put a maximum age for the NSB at 3780 Myr. However, this interpretation is inconsistent with the principle of inclusion, because the maximum age for the detrital quartzite should be constrained by the youngest 3718 Myr detrital zircon. This, however, is in conflict with the minimum age of 3770 Myr for the NSB supported by the age of the cross-cutting felsic rocks<sup>69</sup>. Other studies ascertained the same U–Pb age of 3794 ± 16 Myr for the fuchsitic rocks, which they conversely interpreted as metasomatically altered felsic orthogneiss of intrusive origin<sup>13</sup>, hence providing a minimum age for the NSB. A Hadaean age for the NSB is supported by the <sup>142</sup>Nd isotopic composition of the mafic amphibolites. <sup>142</sup>Nd is the daughter product of <sup>146</sup>Sm, and because the parent isotope has a short half-life of 103 Myr, any deviation in <sup>142</sup>Nd compared to modern terrestrial standards implies Sm–Nd fractionation before ca. 4000 Myr, prior to extinction of <sup>146</sup>Sm. A significant number of NSB amphibolites exhibit anomalous <sup>142</sup>Nd compositions compared to modern terrestrial standards. The correlation

between the  $^{142}\text{Nd}/^{144}\text{Nd}$  and Sm/Nd ratios for all three groups of NSB amphibolite is interpreted by some <sup>14,15</sup> to represent an isochron giving an igneous age of ca. 4290 Myr for the NSB metavolcanic rocks. This Hadaean age has been challenged by some who interpreted the  $^{142}\text{Nd}/^{144}\text{Nd}$  vs. Sm/Nd correlation to reflect mixing with a Hadaean-enriched reservoir <sup>72</sup>. However, this correlation is preserved between the mafic amphibolite and their ultramafic co-genetic cumulates, which can be used to argue against mixing as a cause of the  $^{142}\text{Nd}/^{144}\text{Nd}$  vs. Sm/Nd correlation <sup>14</sup>. The composition of these ultramafic rocks is controlled by olivine fractionation and they are interpreted to be co-genetic cumulates to the mafic amphibolites <sup>11</sup>. The  $^{142}\text{Nd}/^{144}\text{Nd}$  vs. Sm/Nd correlation between the hypothesised mafic liquids and ultramafic cumulates can only be produced if the igneous fractionation occurs while  $^{146}\text{Sm}$  was still decaying, i.e. prior to 4000 Myr. A Hadaean age for the NSB is also supported by the  $^{147}\text{Sm}$ - $^{144}\text{Nd}$  isotopic composition of intruding gabbro sills that yield an isochron age of ca.  $4100 \pm 100$  Myr, which would establish a minimum age for the NSB metavolcanic rocks <sup>14</sup>.

Hence, there is still no consensus on the exact age of the NSB, but nonetheless, it is at least 3770 Ma and possibly as old as 4290 Myr, which makes the NSB BIF among the oldest, if not the oldest, chemical sedimentary rocks known on Earth.

### **Jaspers and BIFs metamorphosed at the upper greenschist/ lower amphibolite facies**

Eoarchaean supracrustal belts worldwide are generally metamorphosed to at least upper amphibolite facies. The metamorphic mineral assemblages of BIFs are well-documented <sup>73</sup>. Petrographic and quantitative analysis of elements in Fe-silicate minerals within BIFs can be used to constrain metamorphic facies. In the BIFs of the NSB, the highest-grade samples exhibit extensive recrystallization and dissemination of coarse magnetite layers, and contain fayalite and pyroxene that indicate amphibolite- to granulite-facies conditions. With decreasing grades, the BIFs lack fayalite and instead contain minor pyroxene, amphiboles (predominantly grunerite-cummingtonite), and retrograde phyllosilicates (clinochlore). The low-grade BIFs contain patches of fine and coarse grained quartz. The very lowest grade BIFs have acicular stilpnomelane, minnesotaite, and rhombohedral ferroan calcite (Fig. E3D). The stilpnomelane in lower grade BIF is likely prograde, because this mineral does not form massive pseudomorphs after higher grade minerals, but rather fine euhedral laths. An upper stability field of 430-470°C and 5-6 Kbar is proposed for stilpnomelane <sup>74</sup>. Furthermore, the presence of chert suggests that the P-T conditions of these prograde stilpnomelane-bearing samples did not exceed much past upper greenschist facies.

## Null hypothesis and abiotic formation of haematite tubes and filaments

The null hypothesis in the context of early life studies requires one to assess the likelihood of plausible abiotic explanations for observations purporting to support a biological phenomenon. If all plausible abiotic explanations are considered and assessed to be significantly unlikely, then one can reject the null hypothesis leaving a biological interpretation for the observed features. Below we consider the possible abiogenic mechanisms that could have created haematite tubes and filaments akin to those documented in the NSB.

First, the NSB tubes rarely branch, are commonly straight, and exhibit parallel orientation that may reflect preferred mineral growth. If iron was remobilised along crystal boundaries of acicular minerals as they grew during diagenesis and metamorphism, tube-like structures of haematite could have formed. However, if the precursor was not opal then the mineral would need to have been replaced completely, because only quartz is found inside the tubes. Secondly, acicular mineral growth in rocks is not uniform in shape, in contrast to the consistent morphology observed for the tubes.

Likewise, metamorphic processes may elongate quartz-hosted haematite to produce aligned, tubular structures like the tubes in the NSB, through fluctuating volume change in the rock during silica remobilisation or metamorphic stretching. Such processes would lead to the structures and minerals in the local environment being preferentially and consistently aligned, yet the orientation of ribbons and tubes of nanoscopic haematite (Fig. 1C) in the NSB jasper is highly variable over scales from hundreds of microns to millimetres. However, the presence of 500- $\mu\text{m}$  gaps in iron-oxide layers (Fig. E3B) showing strong alignment of tubes and ribbons of haematite raises the possibility that during metamorphism elevated strain pressure pried apart these iron-oxide layers, which subsequently were infilled with silica and haematite that nucleated on the iron-oxide layers and were elongated during continued layer separation. In addition, layers and pre-existing amorphous structures of haematite may have, under pressure, undergone a process similar to neurulation, whereby layers of haematite are pressed together to form tubes. The two mechanisms above could, in theory, form consistently sized tubes in the range of 16–30  $\mu\text{m}$  by reaching a critical size limit, but it is highly unlikely that such mechanisms can facilitate the growth of multiple tubes from a single haematite knob at varying angles (Fig. 1A, E4), both horizontally and vertically during prograde metamorphism, together with the formation of internal filaments and similarly coiled, branched, and twisted filaments (Fig. E4) with delicate haematite envelopes (Fig. 1C). In addition, their close spatial association with carbonate and graphite (Fig. E5D) is most compelling and consistent with a biogenic origin for these tubes and filaments.

Because formation of the NSB tubes via the above metamorphic processes fails to fully explain the NSB tubular structures as metamorphic products, a primary origin of the tubular structures is considered more probable. Nonetheless, there still exist exotic processes that may produce pseudo-microfossils under certain conditions<sup>75</sup>. However, these known exotic processes form filaments of silica and barium carbonate and form under very alkaline conditions, which are unlikely to be relevant for the sea-floor environment of deposition of the NSB jaspers (which lack barite) and formation of the contained tubes. Similar iron-oxide tubes like those present in the NSB have been synthesised using iron-ammonium-sulphate solutions and electric currents, or via mixing

of hydrogen with ammonia bubble streams<sup>76</sup>. Notably, these synthesised tubes are demonstrably different from those in the NSB and younger jaspers. Firstly, the experimental tubes have solid walls of iron oxide and consist of a complex mixture of Fe minerals that vary depending on the nature of the bubble solution, whereas the NSB tube walls are composed only of dispersed, individual, nanoscale grains of haematite, consistent with the recrystallization of primary Fe-oxyhydroxide precipitates from seawater. Secondly, the experimental tubes are variable in size, which contrasts with the generally consistent size of the NSB tubes; yet, a number of tubes in the NSB jasper are strongly deformed and display irregular forms and sizes (Fig. 2D). Finally, the synthesised tubes lack internal chains of platy haematite or any other phase, unlike the NSB tubes.

Whereas tubular structures in modern and lithified hydrothermal precipitates are interpreted almost exclusively as microfossils, some branching filaments have been attributed to inorganic, self-organized mineral growth of Fe-oxyhydroxide, controlled by redox fronts in a silica gel<sup>77</sup>. However, such structures are highly branching and are not reported to occur as tubes, but instead as solid Fe-oxyhydroxide filaments, and hence are debated in terms of biological origin<sup>28</sup>. Similarly, Fe-oxyhydroxide filaments could form abiogenically in a Fe-Si gel and then be coated subsequently by colloidal silica and Fe-oxyhydroxide to form tubes with internal filaments, like those observed in the NSB. However, this process fails to explain the tubes that lack internal filaments, because silica has never been proven to replace haematite, and fails to explain their associations with carbonate and CM; thus, the tubes are unlikely to have formed via this process. Rather, in our interpretation, silica precipitated on and replaced bacterial filaments, which were then coated with nanoscale Fe-oxyhydroxide to form the tubes, while minor amounts of microbial organic matter from the filaments was oxidised to carbonate that are now preserved as carbonate-graphite associations with the filaments (Fig. E5). In summary, the NSB haematite tubes and filaments cannot be explained fully by any known abiotic mechanism, and in light of their association with multiple, independent lines of evidence supporting biological activity, the simple uniting explanation is that these tubes and filaments represent fossilised microbial remains.

**Table S1 Laser Ablation parameters**

|                       |                                   |                |       |
|-----------------------|-----------------------------------|----------------|-------|
| Wavelength            | 193 nm                            | Pulse duration | 20 ns |
| Energy fluency        | 2.5 J/cm <sup>2</sup>             |                |       |
| Ablation spot size    | 25 μm                             |                |       |
| Pulse repetition rate | 10 Hz                             |                |       |
| Ablation time / spot  | 25 / 30 s (U-Pb / trace elements) |                |       |

LA-ICP-MS instrument parameters

RF power 1340 W  
 Ar Carrier Gas flow 1.04 l/min  
 He gas flow 950 ml/min  
 Sweep Time 400 / 900 ms (U-Pb / trace elements)

**Table S2 Acquired masses for U-Pb dating. <sup>235</sup>U was omitted, natural <sup>238</sup>U/<sup>235</sup>U ratio of 137.88 is assumed.**

| Mass | Element | Dwell time |
|------|---------|------------|
| 29   | Si      | 5ms        |
| 43   | Ca      | 5ms        |
| 44   | Ca      | 5ms        |
| 206  | Pb      | 100ms      |
| 207  | Pb      | 200ms      |
| 208  | Pb      | 100ms      |
| 221  | bkg     | 5ms        |
| 232  | Th      | 100ms      |
| 238  | U       | 100ms      |

**Table S3 Acquired masses for trace elements.**

| Mass | Element    | Dwell time |
|------|------------|------------|
| 23   | Na         | 5ms        |
| 27   | Al         | 5ms        |
| 29   | Si         | 5ms        |
| 43   | Ca         | 5ms        |
| 44   | Ca         | 5ms        |
| 55   | Mn         | 10ms       |
| 88   | Sr         | 50ms       |
| 89   | Y          | 50ms       |
| 137  | Ba         | 50ms       |
| 139  | La         | 50ms       |
| 140  | Ce         | 50ms       |
| 141  | Pr         | 50ms       |
| 146  | Nd         | 50ms       |
| 147  | Sm         | 50ms       |
| 153  | Eu         | 50ms       |
| 157  | Gd         | 50ms       |
| 159  | Tb         | 50ms       |
| 163  | Dy         | 50ms       |
| 165  | Ho         | 50ms       |
| 166  | Er         | 50ms       |
| 169  | Tm         | 50ms       |
| 172  | Yb         | 50ms       |
| 175  | Lu         | 50ms       |
| 221  | background | 5ms        |

Table. S4 List of samples and their locations and methods used in this study

| Formation                                          | Samples                                              | Age      | General rock type    | Optical microscopy | Raman microscopy | SEM/EPMA | FIB | LA-ICP-MS | Samples locations |                 |
|----------------------------------------------------|------------------------------------------------------|----------|----------------------|--------------------|------------------|----------|-----|-----------|-------------------|-----------------|
|                                                    |                                                      |          |                      |                    |                  |          |     |           | Northings         | Eastings        |
| Løkken ophiolite, Høydal jaspers, Norway           | HO6A, HO7B, TG-82-S6, TG-82-H19 and H16, Jah-1 and 2 | 0.485 Ga | Jasper               | X                  | X                | X        |     |           |                   | Mine tailings   |
| Animike, Mesabi range, Biwabik Iron Formation, USA | MARY-ELLEN1                                          | 1.8 Ga   | Stromatolitic jasper | X                  | X                |          |     |           |                   | Mine tailings   |
| Brockman formation, Dales gorge group, Australia   | DGH1_273'1"                                          | 2.5 Ga   | BIF/Fe-cherts        | X                  | X                | X        |     |           |                   | DGH1 drill core |
|                                                    | PC0822, PC0823, PC0824                               |          |                      |                    |                  |          |     |           | 58 16 50.9        | 77 44 14.7      |
| NSB                                                | PC0825                                               |          |                      |                    |                  |          |     |           | 58 17 08.7        | 77 44 12.2      |
|                                                    | PC028/A                                              | >3.77 Ga | BIF/jasper           | X                  | X                | X        | X   | X         | 58 17 09.1        | 77 44 10.8      |
|                                                    | PC0844                                               |          |                      |                    |                  |          |     |           | 58 16 53.8        | 77 44 14.1      |

Table S5. Iron-oxide tubes and filaments

| Locality                                              | Age                          | Host rock                                                                                   | Diameter Length                              | Mineralogy                                                                       | Additional                                                                                                                             | Reference  |
|-------------------------------------------------------|------------------------------|---------------------------------------------------------------------------------------------|----------------------------------------------|----------------------------------------------------------------------------------|----------------------------------------------------------------------------------------------------------------------------------------|------------|
| Lau hydrothermal basin, Pacific ocean                 | Present day                  | Fe-Si hydrothermal vent sediments                                                           | 0.5-1.5µm<br>10-100µm                        | Iron-oxide-silica                                                                | Straight, helical and curved varieties. Core of filaments iron-oxide coated by amorphous silica                                        | 78         |
| Chocolate pot hot springs, Yellowstone, USA           | Present day                  | Iron-rich hydrothermal springs                                                              | 1.5µm<br>>100µm                              | Ferrihydrite                                                                     | Very low Total organic carbon present in buried microbial mats                                                                         | 79         |
| Southwest Indian Ridge, Indian Ocean                  | Present day                  | Fe-Si oxyhydroxide                                                                          | 2-10µm<br>10-100µm                           | Ferrihydrite                                                                     | Filaments can be curved and intertwining or form bundles of rod-like filaments with the same orientations, diameter and length         | 80         |
| Franklin Seamount, Woodlark Basin, Papua New Guinea   | Present day                  | Fe-Si-Mn oxyhydroxides                                                                      | 0.5-5µm                                      | Iron-oxide-silica                                                                | Filaments have hollow structure with walls of iron oxyhydroxide. Filaments branch and some occur as orientated parallel to one another | 24         |
| Various ophiolites and modern day vent sites          | Late Jurassic to present day | Inter-pillow cherts, Jasper, Fe-Si seafloor gels and inactive chimney fragments             | 1-10 µm                                      | Iron-oxide-silica-pyrite-barite                                                  |                                                                                                                                        | 22         |
| Numerous deposits                                     | 490 Ma to Present day        | Jaspers                                                                                     | 1.2-30 µm<br>20-3000 µm                      | haematite-iron-oxide                                                             | See tables 1, 2 and 3 in Little et al., 2014. Tubes with internal platy haematite chains (Løkken deposit)                              | 28         |
| Qigebulake Formation, Northwestern Tarim Basin, China | 551-541 Ma                   | Hydrothermal quartz veins                                                                   | 1-5 µm<br>20-200µm                           | Goethite-haematite                                                               | No organic carbon detected by Raman                                                                                                    | 80         |
| Jerome mining district, central Arizona, USA          | 1738 Ma                      | Jasper-IF-VMS                                                                               | 1-3 µm<br>30-50 µm                           | haematite                                                                        |                                                                                                                                        | 81         |
| Frere formation, Australia                            | 1880 Ma                      | Jasper/IF                                                                                   | Tubes 4-9 µm<br>Filament 0.5-2 µm<br>100s µm | Nanoscale haematite                                                              | Filaments orientated parallel to oncolites                                                                                             | 50         |
| Gunflint iron-formation, North America                | 1880 Ma                      | Jasper/IF                                                                                   | 0.5-8 µm<br>Can exceed 300 µm                | Nanoscale haematite                                                              | Same filament morphologies in other areas of the formation are preserved by organic matter                                             | 82,83      |
| Kittilä jaspers, Finland                              | ca. 2000 Ma                  | Jasper                                                                                      | ?                                            | Nanoscale 'dusty' haematite                                                      |                                                                                                                                        | 84         |
| Hammersley BIF, Dales gorge member, Australia         | 2500 Ma                      | BIF (haematite + quartz + magnetite + stilpnomelane + ankerite + minnesotaite + riebeckite) | 5 µm<br>100 µm                               | haematite-dolomite                                                               | Filaments preserved as carbonate moulds attached to iron spheres                                                                       | 85         |
| Nuvvuagittuq supracrustal belt, Canada (filaments)    | 3750 Ma                      | Jasper (haematite + quartz + magnetite + ripidolite + chalcopyrite ± calcite ± apatite)     | 1-7 µm<br>35-500µm                           | Platy-haematite, acicular, grey haematite, moulds in massive nanoscale haematite | Filaments commonly encapsulated by nanoscale haematite. Some have a forked-end. Others exhibit branching                               | This study |
| Nuvvuagittuq supracrustal belt, Canada (tubes)        | 3750 Ma                      | Jasper (haematite + quartz + magnetite + ripidolite + calcite + chalcopyrite + apatite)     | 20-30 µm<br>80-300µm                         | Nanoscale haematite                                                              | Some contain a central chain of platy haematite                                                                                        | This study |

Table S6. Carbonate rosettes in IFs

| Locality                                     | Age      | Host rock                                                                                   | Diameters             | Carbonate         | Additional                                                                                                                           | Reference      |
|----------------------------------------------|----------|---------------------------------------------------------------------------------------------|-----------------------|-------------------|--------------------------------------------------------------------------------------------------------------------------------------|----------------|
| Høydal, Norway                               | 480 Ma   | Jaspers associated with VMS deposits                                                        | 100-250 $\mu\text{m}$ | Ankerite          | Form circular and rhombohedra rosettes, overgrow haematite filaments; can contain inclusions of CM and associated with apatite       | 26; This study |
| Gunflint iron-formation, North America       | 1880 Ma  | Jasper/ IF                                                                                  | 20-40 $\mu\text{m}$   | Siderite          | Associated with CM and sometimes contain cores of apatite                                                                            | 85, 86, 41, 87 |
| Hamersley BIF, Dales gorge member, Australia | 2500 Ma  | BIF (haematite + quartz + magnetite + stilpnomelane + ankerite + minnesotaite + riebeckite) | 100-300 $\mu\text{m}$ | Ankerite-siderite | Generally rhombohedral in shape, with poikilobitic textures developing, which form a sphere-shaped centre. Associated with CM layers | This study     |
|                                              |          |                                                                                             | 60-80 $\mu\text{m}$   | Dolomite-ankerite | Sometimes have a rosette structure in the middle                                                                                     | 88             |
| Nuvvuagittuq supracrustal belt, Canada       | >3770 Ma | BIF (Calcite + quartz + magnetite + stilpnomelane + haematite + apatite + chalcopyrite)     | 20-180 $\mu\text{m}$  | Fe-calcite        | Poikilobitic, rosettes generally rounded, associated with apatite, can contain inclusions of CM and haematite                        | This study 18  |

Table S7. Iron-oxide rosettes

| Locality                                     | Age              | Host rock                                                                                   | Diameters                                   | Mineralogy                                      | Additional                                                                       | Reference  |
|----------------------------------------------|------------------|---------------------------------------------------------------------------------------------|---------------------------------------------|-------------------------------------------------|----------------------------------------------------------------------------------|------------|
| Lau hydrothermal basin, Pacific ocean        | Present day      | Fe-Si hydrothermal vent sediments                                                           | 0.1-2 $\mu\text{m}$                         | Si-Ferrihydrite                                 | Associated branching filaments                                                   | 90, 23     |
| Edmond vent field, Indian ocean              | Present day      | Inner surface of sulphide chimney                                                           | 1 $\mu\text{m}$                             | Non-crystalline silica and acicular iron oxides | Mineralized cells, with cytoplasm preserved                                      | 91         |
| Milos, Greece                                | 2Ma              | Hydrothermal vent iron-formation                                                            | 30 $\mu\text{m}$                            | haematite                                       | Associated filaments, crumpled cores                                             | 33         |
| Lokken-Hoydal, Norway                        | 480Ma            | Jaspers associated with VMS deposits                                                        | 10-100 $\mu\text{m}$                        | haematite-quartz                                | Forms mm thick layers, large diversity, haematite cores, multi-layered varieties | 27         |
| Mount Windsor, Australia                     | ca. 485Ma        | Jaspers associated with VMS deposits                                                        | 100 $\mu\text{m}$                           | haematite-quartz                                | Multi-layered varieties                                                          | 29         |
| Frere formation, Australia                   | 1850 Ma          | Jasper/ IF                                                                                  | 20-50 $\mu\text{m}$                         | haematite-quartz                                | haematite cores and associated haematite filaments                               | This study |
| Gunflint iron-formation, North America       | 1880 Ma          | Jasper/ IF                                                                                  | 3-30 $\mu\text{m}$                          | haematite-quartz                                |                                                                                  | 82, 86     |
| Sokoman formation, Canada                    | 1900 Ma          | Jasper                                                                                      | 3-25 $\mu\text{m}$                          | haematite-quartz                                |                                                                                  | 86, 92, 93 |
| Great Slave group                            | Paleoproterozoic | IF                                                                                          | 10-15 $\mu\text{m}$                         | haematite-quartz                                |                                                                                  | This study |
| Kittilä jaspers, Finland                     | ca. 2000 Ma      | Jasper                                                                                      | ?                                           | haematite                                       |                                                                                  | 84         |
| Boolgeeda formation, Australia               | 2400 Ma          | BIF (haematite + quartz + magnetite + riebeckite + stilpnomelane + goethite + apatite)      | 10-15 $\mu\text{m}$                         | haematite-quartz                                | Forms mm thick layers                                                            | This study |
| Hamersley BIF, Dales gorge member, Australia | 2500 Ma          | BIF (haematite + quartz + magnetite + stilpnomelane + ankerite + minnesotaite + riebeckite) | 5-20 $\mu\text{m}$                          | haematite-quartz                                |                                                                                  | 94         |
|                                              |                  |                                                                                             |                                             | Stilpnomelane and opaque pigments               |                                                                                  | 89         |
| Hamersley BIF, Marra Mamba member, Australia | 2500 Ma          | BIF (haematite + quartz + magnetite + stilpnomelane + ankerite + minnesotaite + riebeckite) | 120-200 nm                                  | haematite-quartz                                |                                                                                  | 95         |
| Carajás formation, Brazil                    | 2740 Ma          | BIF (haematite + quartz + magnetite)                                                        | 20-30 $\mu\text{m}$                         | haematite-quartz-kerogen                        |                                                                                  | 96         |
| Nuvvuagittuq supracrustal belt, Canada       | >3770 Ma         | BIF (haematite + quartz + magnetite + ripidolite + calcite + chalcopyrite + apatite)        | 15-30 $\mu\text{m}$<br>60-100 $\mu\text{m}$ | haematite-quartz                                | Small and large varieties. Some have haematite cores and concentric layers       | This study |

Table S8 Wavelength-dispersive spectroscopy (WDS) analysis of various minerals in the NSB BIF and jaspers.

| Mineral (Sample*)   | F   | Cl  | Na <sub>2</sub> O | K <sub>2</sub> O | MgO  | SiO <sub>2</sub> | Al <sub>2</sub> O <sub>3</sub> | CaO  | P <sub>2</sub> O <sub>5</sub> | FeO (Total Fe) | MnO | ZnO | TiO <sub>2</sub> | Total |
|---------------------|-----|-----|-------------------|------------------|------|------------------|--------------------------------|------|-------------------------------|----------------|-----|-----|------------------|-------|
| Fluro-apatite (E-F) | 1.6 | 0.1 | 0.0               | 0.0              | 0.0  | 0.2              | 0.0                            | 56.2 | 25.3                          | 0.1            | 0.0 | 0.0 | 0.0              | 82.9  |
| Fluro-apatite (E-F) | 1.4 | 0.3 | 0.0               | 0.0              | 0.0  | 0.5              | 0.0                            | 53.2 | 26.0                          | 0.2            | 0.0 | 0.0 | 0.0              | 81.1  |
| Stilpnomelane (E-F) | 0.0 | 0.0 | 0.0               | 1.1              | 4.6  | 47.9             | 4.7                            | 0.0  | 0.0                           | 33.8           | 0.3 | 0.0 | 0.0              | 92.6  |
| Stilpnomelane (E-F) | 0.0 | 0.0 | 0.0               | 1.2              | 4.5  | 48.3             | 4.8                            | 0.0  | 0.0                           | 34.3           | 0.3 | 0.0 | 0.0              | 93.4  |
| Magnetite (E-F)     | 0.0 | 0.0 | 0.0               | 0.0              | 0.0  | 0.6              | 0.1                            | 0.2  | 0.0                           | 94.3           | 0.0 | 0.1 | 0.0              | 95.3  |
| Fe-calcite (E-F)    | 0.0 | 0.0 | 0.1               | 0.0              | 0.3  | 0.3              | 0.3                            | 69.9 | 0.0                           | 2.8            | 1.0 | 0.1 | 0.0              | 74.7  |
| Ankerite (D)        | 0.0 | 0.0 | 0.0               | 0.0              | 0.4  | 0.0              | 0.0                            | 69.6 | 0.0                           | 4.8            | 1.6 | 0.0 | 0.2              | 76.4  |
| Mg-ankerite (D)     | 0.0 | 0.0 | 0.0               | 0.0              | 16.2 | 0.2              | 0.0                            | 30.5 | 0.0                           | 16.9           | 1.1 | -   | -                | 64.8  |

\*Sample makes reference to thin sections in Figure E3. Low totals attributed to no analysis for REE, hydroxyl and carbon.

Table S9 Raman parameters of graphitic carbon in carbonate rosettes (Fig. E6C).

| Grain No. | G-band position | G-band FWHM | D-band position | D-band FWHM | 2D-band position | 2D-band FWHM | D-band area | G+D2 band area | D/G intensity | 2D/ G intensity | T estimate Beyssac <sup>55</sup> ± 50°C |
|-----------|-----------------|-------------|-----------------|-------------|------------------|--------------|-------------|----------------|---------------|-----------------|-----------------------------------------|
| G1        | 1576            | 9.78        | 1339            | 6.25        | N.D              | N.D          | 222.69      | 749.98         | 1.32          | N.D             | 539                                     |
| G2        | 1567            | 9.80        | 1341            | 9.97        | 2702             | 5.41         | 238.21      | 803.49         | 0.32          | 0.23            | 539                                     |
| G3        | 1565            | 10.57       | 1350            | 6.13        | 2704             | 4.71         | 358.58      | 640.57         | 0.41          | 0.48            | 481                                     |
| G4        | 1579            | 7.31        | 1345            | 11.25       | 2704             | 5.54         | 299.53      | 369.09         | 0.56          | 0.11            | 441                                     |
| G5        | 1557            | 10.61       | 1337            | 9.58        | 2674             | 7.94         | 87.27       | 355.61         | 0.13          | 0.2             | 553                                     |
| G6        | 1569            | 12.04       | 1334            | 15.74       | 2684             | 9.22         | 66.72       | 158.05         | 0.61          | 0.36            | 509                                     |
| SG1       | 1584            | 5.63        | 1343            | 5.77        | 2708             | 4.46         | 140.11      | 672.22         | 0.08          | 0.05            | 564                                     |
| SG2       | 1569            | 8.98        | 1331            | 6.60        | 2680             | 5.58         | 160.64      | 586.33         | 0.13          | 0.12            | 545                                     |
| SG3       | 1577            | 6.91        | 1343            | 12.06       | 2702             | 5.66         | 162.30      | 500.62         | 0.18          | 0.14            | 532                                     |
| SG4       | 1577            | 6.80        | 1334            | 7.68        | 2696             | 4.67         | 167.80      | 515.40         | 0.56          | 0.13            | 532                                     |
| SG5       | 1583            | 5.65        | 1347            | 13.18       | 2702             | 5.26         | 284.12      | 831.28         | 0.24          | 0.05            | 528                                     |
| SG6       | 1569            | 10.56       | 1344            | 6.87        | 2705             | 4.95         | 127.96      | 367.99         | 0.44          | 0.44            | 526                                     |
| SG7       | 1570            | 10.22       | 1346            | 9.73        | 2725             | 6.82         | 122.76      | 278.79         | 0.34          | 0.22            | 505                                     |
| SG8       | 1577            | 6.29        | 1345            | 15.36       | 2700             | 5.09         | 365.76      | 711.13         | 0.30          | 0.16            | 490                                     |
| SG9       | 1565            | 7.64        | 1342            | 7.43        | 2668             | 5.21         | 1203.96     | 2265.20        | 0.23          | 0.08            | 487                                     |
| SG10      | 1580            | 7.19        | 1349            | 7.26        | 2704             | 4.58         | 227.73      | 371.57         | 0.28          | 0.21            | 472                                     |
| SG11      | 1570            | 8.28        | 1339            | 6.63        | 2705             | 5.06         | 604.43      | 937.62         | 0.29          | 0.31            | 467                                     |
| SG12      | 1579            | 7.32        | 1345            | 11.30       | 2704             | 5.63         | 322.68      | 346.98         | 0.56          | 0.12            | 442                                     |
| SG13      | 1583            | 6.17        | 1344            | 12.66       | 2717             | 6.58         | 105.02      | 119.06         | 0.37          | 0.20            | 432                                     |
| SG14      | 1581            | 10.16       | 1344            | 14.20       | 2676             | 6.20         | 657.67      | 537.29         | 1.10          | 0.27            | 396                                     |

\* Grains starting with G- are from the Raman scan in Fig 3D and grains starting with SG- are from the Raman scan in Fig E6.

Table S10 Raman parameters of graphitic carbon from NSB jasper sample (Fig. E8E).

| G-band position | G-band FWHM | D-band position | D-band FWHM | 2D-band position | 2D-band FWHM | D-band area | G+D2 band area | D/G intensity | 2D/ G intensity | T estimate Beyssac <sup>55</sup> ±50°C |
|-----------------|-------------|-----------------|-------------|------------------|--------------|-------------|----------------|---------------|-----------------|----------------------------------------|
| 1581            | 6.18        | 1359            | 12.70       | 2715             | 9.01         | 63.77       | 260.57         | 0.10          | 0.24            | 554                                    |
| 1583            | 7.29        | 1348            | 14.30       | 2709             | 10.33        | 87.76       | 141.04         | 0.46          | 0.51            | 470                                    |
| 1581            | 7.03        | 1346            | 11.50       | 2714             | 12.43        | 79.70       | 442.69         | 0.15          | 0.25            | 573                                    |

Table S11 Raman parameters of poorly crystalline graphite from NSB. NR – Not resolvable (Fig. E8F).

| Spectrum No. | G-band position | G-band FWHM | D-band position | D-band FWHM | 2D-band position | 2D-band FWHM | D-band area | G+D2 band area | D/G intensity | 2D/ G intensity | T estimate Beyssac <sup>55</sup> ± 50°C |
|--------------|-----------------|-------------|-----------------|-------------|------------------|--------------|-------------|----------------|---------------|-----------------|-----------------------------------------|
| 1            | 1585            | 9.38        | 1351            | 8.98        | 2692             | 17.55        | 2614.56     | 1701.18        | 1.66          | 0.45            | 371                                     |
| 2            | 1591            | 7.30        | 1352            | 6.15        | 2701             | 4.66         | 1238.30     | 788.34         | 2.14          | 0.14            | 369                                     |
| 3            | 1591            | 7.47        | 1355            | 10.10       | NR               | NR           | 169.90      | 87.62          | 1.91          | NR              | 347                                     |

## Supplementary data references

- 60 Mills, R. A., Clayton, T. & Alt, J. C. Low-temperature fluid flow through sulfidic sediments from TAG: modification of fluid chemistry and alteration of mineral deposits. *Geophysical research letters* **23**, 3495–3498 (1996).
- 61 Alt, J. C. Hydrothermal oxide and nontronite deposits on seamounts in the eastern Pacific. *Marine Geology* **81**, 227–239 (1988).
- 62 Mills, R. A., Elderfield, H. & Thomson, J. A dual origin for the hydrothermal component in a metalliferous sediment core from the Mid-Atlantic Ridge. *Journal of Geophysical research* **98**, 9671–9681 (1993).
- 63 Grenne, T. & Slack, J. F. Paleozoic and Mesozoic silica-rich seawater: Evidence from hematitic chert (jasper) deposits. *Geology* **31**, 319–322 (2003).
- 64 Grenne, T. & Slack, J. F. Geochemistry of Jasper Beds from the Ordovician Løkken Ophiolite, Norway: Origin of Proximal and Distal Siliceous Exhalites. *Economic Geology* **100**, 1511–1527 (2005).
- 65 O’Neil, J., Boyet, M., Carlson, R. W. & Paquette, J.-L. Half a billion years of reworking of Hadean mafic crust to produce the Nuvvuagittuq Eoarchean felsic crust. *Earth and Planetary Science Letters* **379**, 13–25, doi:10.1016/j.epsl.2013.07.030 (2013).
- 66 David, J., Godin, L., Stevenson, R., O’Neil, J. & Francis, D. U–Pb ages (3.8–2.7 Ga) and Nd isotope data from the newly identified Eoarchean Nuvvuagittuq supracrustal belt, Superior Craton, Canada. *Geological Society of America Bulletin* **121**, 150–163, doi:10.1130/B26369.1 (2009).
- 67 Turner, S., Rushmer, T., Reagan, M. & Moyen, J. F. Heading down early on? Start of subduction on Earth. *Geology* **42**, 139–142, doi:10.1130/g34886.1 (2014).
- 68 Franklin, J. M., Gibson, H. L., Jonasson, I. R. & Galley, A. G. in *Economic Geology: One Hundredth Anniversary Volume* (eds J.W Hedenquist, J.F.H Thompson, R.J Goldfarb, & J.P Richards) 523–560 (The Economic Geology Publishing Company, 2005).
- 69 Cates, N. L. & Mojzsis, S. J. Pre-3750 Ma supracrustal rocks from the Nuvvuagittuq supracrustal belt, northern Québec. *Earth and Planetary Science Letters* **255**, 9–21, doi:10.1016/j.epsl.2006.11.034 (2007).
- 70 Boily, M., Leclair, A., Maurice, C., Bédard, J. H. & David, J. Paleo- to Mesoarchean basement recycling and terrane definition in the Northeastern Superior Province, Québec, Canada. *Precambrian Research* **168**, 23–44, doi:10.1016/j.precamres.2008.07.009 (2009).
- 71 Augland, L. E. & David, J. Protocrustal evolution of the Nuvvuagittuq Supracrustal Belt as determined by high precision zircon Lu–Hf and U–Pb isotope data. *Earth and Planetary Science Letters* **428**, 162–171, doi:10.1016/j.epsl.2015.07.039 (2015).
- 72 Roth, A. S. G. *et al.* Inherited 142Nd anomalies in Eoarchean protoliths. *Earth and Planetary Science Letters* **361**, 50–57, doi:10.1016/j.epsl.2012.11.023 (2013).
- 73 Klein, C. Some Precambrian banded iron-formations (BIFs) from around the world: Their age, geologic setting, mineralogy, metamorphism, geochemistry, and origins. *American Mineralogist* **90**, 1473–1499, doi:10.2138/am.2005.1871 (2005).
- 74 Miyano, T. & Klein, C. Phase equilibria in the system K<sub>2</sub>O - FeO - MgO - Al<sub>2</sub>O<sub>3</sub> - SiO<sub>2</sub> - H<sub>2</sub>O - CO<sub>2</sub> and the stability limit of stilpnomelane in metamorphosed Precambrian iron-formations. *Contributions to Mineralogy and Petrology* **102**, 478–491 (1989).
- 75 Garcia-Ruiz, J. M. *et al.* Self-assembled silica-carbonate structures and detection of ancient Microfossils. *Science* **302**, 1194–1197 (2003).
- 76 Stone, D. A. & Goldstein, R. E. Tubular precipitation and redox gradients on a bubbling template. *Proceedings of the national academy of science* **101**, 11537–11541, doi:10.1073/pnas.0404544101 (2004).
- 77 Hopkinson, L., Roberts, S., Herrington, R. & Wilkinson, J. Self-organization of submarine hydrothermal siliceous deposits: Evidence from the TAG hydrothermal mound, 26N Mid-Atlantic ridge. *Geology* **26** (1998).
- 78 Li, J. *et al.* Microbial diversity and biomineralization in low-temperature hydrothermal iron-silica-rich precipitates of the Lau Basin hydrothermal field. *FEMS Microbiology Ecology* **81**, 205–216, doi:10.1111/j.1574-6941.2012.01367.x (2012).
- 79 Parenteau, M. N. & Cady, S. L. Microbial Biosignatures in Iron-Mineralized Phototrophic Mats at Chocolate Pots Hot Springs, Yellowstone National Park, United States. *Palaios* **25**, 97–111, doi:10.2110/palo.2008.p08-133r (2010).

- 80 Zhou, X. *et al.* Biogenic Iron-Rich Filaments in the Quartz Veins in the Uppermost Ediacaran Qigebulake Formation, Aksu Area, Northwestern Tarim Basin, China: Implications for Iron Oxidizers in Subseafloor Hydrothermal Systems. *Astrobiology* **15**, 523-537, doi:10.1089/ast.2014.1234 (2015).
- 81 Slack, J. F., Grenne, T., Bekker, A., Rouxel, O. J. & Lindberg, P. A. Suboxic deep seawater in the late Paleoproterozoic: Evidence from hematitic chert and iron formation related to seafloor-hydrothermal sulfide deposits, central Arizona, USA. *Earth and Planetary Science Letters* **255**, 243-256, doi:10.1016/j.epsl.2006.12.018 (2007).
- 82 Barghoorn, E. S. & Tyler, S. A. Microorganisms from Gunflint Chert - These Structurally Preserved Precambrian Fossils from Ontario Are Most Ancient Organisms Known. *Science* **147**, 563-&, doi:DOI 10.1126/science.147.3658.563 (1965).
- 83 Shapiro, R. S. & Konhauser, K. O. Hematite-coated microfossils: primary ecological fingerprint or taphonomic oddity of the Paleoproterozoic? *Geobiology* **13**, 209-224, doi:10.1111/gbi.12127 (2015).
- 84 Kinnunen, K. A. Primary sedimentary features in Kittila jasper, Finnish Lapland. *The geological society of Finland bulletin* **54**, 69-76 (1982).
- 85 Karkhanis, S. N. Fossil iron bacteria may be preserved in Precambrian ferroan carbonate. *Nature* **261**, 406-407 (1976).
- 86 Laberge, G. L. Possible Biological Origin of Precambrian Iron-Formations. *Economic Geology* **68**, 1098-1109 (1973).
- 87 Winter, B. L. & Knauth, L. P. Stable isotope geochemistry of cherts and carbonates from the 2.0 Ga Gunflint Iron Formation: implications for the depositional setting, and the effects of diagenesis and metamorphism. *Precambrian Research* **59**, 283-313 (1992).
- 88 Carrigan, W. J. & Cameron, E. M. Petrological and stable isotope studies of carbonate and sulfide minerals from the Gunflint Formation, Ontario: evidence for the origin of early Proterozoic iron-formation. *Precambrian Research* **52**, 347-380 (1991).
- 89 Rasmussen, B., Meier, D. B., Krapez, B. & Muhling, J. R. Iron silicate microgranules as precursor sediments to 2.5-billion-year-old banded iron formations. *Geology* **41**, 435-438, doi:10.1130/g33828.1 (2013).
- 90 Sun, Z. *et al.* Mineralogical characterization and formation of Fe-Si oxyhydroxide deposits from modern seafloor hydrothermal vents. *American Mineralogist* **98**, 85-97, doi:10.2138/am.2013.4147 (2012).
- 91 Peng, X. *et al.* Intracellular and extracellular mineralization of a microbial community in the Edmond deep-sea vent field environment. *Sedimentary Geology* **229**, 193-206, doi:10.1016/j.sedgeo.2010.06.003 (2010).
- 92 Knoll, A. H. & Barghoorn, E. S. Ambient Pyrite in Precambrian Chert: New Evidence and a Theory. *Proceedings of the national academy of science* **71**, 2329-2331 (1974).
- 93 Klein, C. & Fink, P. R. Petrology of the Sokoma Iron Formation in the Howells River area, at the western edge of the Labrador trough. *Economic Geology* **71**, 453-487 (1976).
- 94 Ayres, D. E. Genesis of Iron-bearing Minerals in Banded Iron Formation Mesobands in The Dales Gorge Member, Hamersley Group, Western Australia. *Economic Geology* **67**, 1214-1233 (1972).
- 95 Ahn, J. H. & Buseck, P. R. Hematite Nanospheres of Possible Colloidal Origin from a Precambrian Banded Iron Formation. *Science* **250**, 111-113, doi:DOI 10.1126/science.250.4977.111 (1990).
- 96 Ribeiro da Luz, B. & Crowley, J. K. Morphological and chemical evidence of stromatolitic deposits in the 2.75Ga Carajás banded iron formation, Brazil. *Earth and Planetary Science Letters* **355-356**, 60-72, doi:10.1016/j.epsl.2012.08.028 (2012).
